# Supplementary material for: Targeted genomic sequencing identifies PRRT2 mutations as a cause of paroxysmal kinesigenic choreoathetosis
Source: PubMed Central journal article supplement — J Med Genet. 2011 Nov 30;49(2):76–8. doi: 10.1136/jmedgenet-2011-100635 (PMC3261727; doi:10.1136/jmedgenet-2011-100635), 2011-11-30
Supplement: jmedgenet-2011-100635-s2.pdf [file jmedgenet-2011-100635-s2.pdf]

Supplementary Table 1 Summary for targeted genomic sequencing data of five cases and one control

| sample                    | Family 1 |         |         | Family 2 | Family 3 | Family 4 |
|---------------------------|----------|---------|---------|----------|----------|----------|
|                           | III-15*  | II -4   | III-14  | IV-2     | II -2    | III-1    |
| Bases (Mb)                | 2874.44  | 2922.26 | 2987.40 | 2635.44  | 2953.09  | 3390.09  |
| Map bases (Mb)            | 2665.19  | 2725.40 | 2773.49 | 2450.51  | 2752.09  | 3144.94  |
| Map bases rate (%)        | 92.7     | 93.3    | 92.8    | 93.0     | 93.2     | 92.8     |
| Average read length (bp)  | 85.58    | 86.17   | 85.96   | 85.71    | 86.08    | 85.8     |
| Average sequencing depth  | 184.67   | 187.97  | 191.45  | 168.72   | 189.87   | 216.92   |
| Covered length (Mb)       | 13.18    | 13.18   | 13.18   | 13.18    | 13.18    | 13.17    |
| Coverage at least 20× (%) | 98.9     | 99.0    | 99.0    | 98.9     | 98.9     | 99.0     |

\* Healthy control did not carry the risk haplotype we previously identified.

Supplementary Table 2 Identification of the causal gene by targeted genomic sequencing

| Filter                                                  | Family 1 |        | Family 2 | Family 3 | Family 4 |
|---------------------------------------------------------|----------|--------|----------|----------|----------|
|                                                         | II -4    | III-14 | IV -2    | II -2    | III-1    |
| NS/SS/I                                                 | 160      | 157    | 155      | 149      | 158      |
| Not in dbSNP129                                         | 30       | 30     | 38       | 31       | 35       |
| Not in dbSNP129,<br>nor in 1000<br>Genomes              | 24       | 22     | 26       | 20       | 27       |
| Not in dbSNP129,<br>1000 Genomes, nor<br>in one control | 15       | 21     | 15       | 17       | 22       |

NS, nonsynonymous variant; SS, splice-site acceptor or donor variants; I, coding insertions or deletions.

Variants were excluded by dbSNP129, 1000 Genomes, one healthy control (from family 1 did not carry the risk haplotype we previously identified) or all. With loss-of-function filter, two genes were remaining in more than one family.

Supplementary Table 3 Clinical characteristics of sp affected individuals

| No. | Gender | Age | Age at onset | Trigger | Duration of attacks (s) | Involuntary movement | Response to anticonvulsants | Complication | Family history |
|-----|--------|-----|--------------|---------|-------------------------|----------------------|-----------------------------|--------------|----------------|
| 1   | F      | 18  | 11           | SM      | 60                      | C                    | No treatment                | None         | None           |
| 2   | F      | 22  | 12           | SM      | <10                     | D                    | CBZ+                        | None         | None           |
| 3   | M      | 21  | 15           | SM      | 30                      | D                    | CBZ+                        | None         | None           |
| 4   | M      | 23  | 14           | SM      | 2 -3                    | D                    | CBZ+                        | None         | None           |
| 5   | M      | 20  | 10           | SM      | 10                      | D                    | No treatment                | None         | None           |
| 6   | M      | 22  | 10           | SM      | 10                      | C                    | No treatment                | None         | None           |
| 7   | M      | 29  | 18           | SM      | 7-8                     | C/D                  | CBZ+                        | None         | None           |
| 8   | F      | 22  | 13           | SM      | 30                      | D                    | CBZ+                        | None         | None           |
| 9   | M      | 23  | 16           | SM      | 15                      | C/D                  | VPA+                        | None         | None           |
| 10  | M      | 22  | 13           | SM      | 3-4                     | C/D                  | Haloperidol+                | None         | None           |

|    |   |    |    |      |       |     |              |                        |                   |
|----|---|----|----|------|-------|-----|--------------|------------------------|-------------------|
| 11 | M | 24 | 7  | SM   | 10    | D   | No treatment | None                   | None              |
| 12 | F | 21 | 10 | SM   | 30    | D   | No treatment | None                   | None              |
| 13 | M | 26 | 15 | SM   | 2-3   | D   | CBZ+         | Epilepsy               | None              |
| 14 | M | 35 | 9  | SM   | 10-60 | D   | CBZ+         | Epilepsy               | None              |
| 15 | F | 19 | 11 | SM   | 15    | D   | No treatment | Cerebral<br>dysgenesis | None              |
| 16 | M | 32 | 15 | S/SM | 10    | D   | TPM+         | None                   | None              |
| 17 | M | 20 | 5  | SM   | 10-60 | D   | No treatment | IC                     | None              |
| 18 | M | 24 | 13 | SM   | 5     | D   | CBZ+         | None                   | None              |
| 19 | M | 23 | 12 | SM   | 30    | C   | CBZ+         | None                   | Brother           |
| 20 | M | 20 | 12 | S/SM | 30    | D   | CBZ+         | Migraine,<br>epilepsy  | None              |
| 21 | M | 28 | 7  | S/SM | 60    | C   | CBZ+         | None                   | None              |
| 22 | M | 15 | 8  | SM   | 15    | D   | No treatment | None                   | None              |
| 23 | F | 18 | 12 | SM   | 20    | D   | CBZ+         | None                   | None              |
| 24 | M | 16 | 7  | S/SM | 15    | D   | No treatment | None                   | None              |
| 25 | M | 26 | 13 | SM   | 10    | C   | No treatment | None                   | Maternal<br>uncle |
| 26 | M | 23 | 10 | SM   | 20    | D   | No treatment | None                   | None              |
| 27 | M | 23 | 13 | SM   | 10-30 | D   | CBZ+         | None                   | None              |
| 28 | M | 32 | 10 | SM   | 60    | C/D | CBZ+         | None                   | None              |
| 29 | M | 24 | 7  | SM   | 3-5   | C   | CBZ+         | None                   | None              |

F, female; M, male; S, startle; SM, sudden movement; C, choreoathetotic; D, dystonic; CBZ, carbamazepine; VPA, sodium valproate; TPM, topiramate; IC, infantile convulsion.
