# Supplementary material for: Targeted genomic sequencing identifies PRRT2 mutations as a cause of paroxysmal kinesigenic choreoathetosis
Source: PubMed Central journal article supplement — J Med Genet. 2011 Nov 30;49(2):76–8. doi: 10.1136/jmedgenet-2011-100635 (PMC3261727; doi:10.1136/jmedgenet-2011-100635), 2011-11-30
Supplement: jmedgenet-2011-100635-s3.pdf [file jmedgenet-2011-100635-s3.pdf]

**c.841T>C**  
**p.W281R**

**c.859G>A**  
**p.A287T**

**c.922C>T**  
**p.R308C**

|             |      |   |   |   |   |   |   |   |   |   |   |   |   |   |   |   |   |      |   |   |   |   |   |   |   |   |   |   |     |
|-------------|------|---|---|---|---|---|---|---|---|---|---|---|---|---|---|---|---|------|---|---|---|---|---|---|---|---|---|---|-----|
| Human       | ...C | F | C | P | M | W | P | V | N | I | V | A | F | A | Y | A | V | ...V | D | G | A | Q | R | L | G | R | V | A | ... |
| Rhesus      | ...C | F | C | P | M | W | P | V | N | I | V | A | F | A | Y | A | V | ...V | D | G | A | Q | R | L | G | R | V | A | ... |
| Mouse       | ...C | F | C | P | M | W | P | V | N | I | V | A | F | A | Y | A | V | ...V | D | G | A | Q | R | L | G | R | V | A | ... |
| Dog         | ...C | F | C | P | M | W | P | V | N | I | V | A | F | A | Y | A | V | ...V | D | G | A | Q | R | L | G | R | V | A | ... |
| Elephant    | ...C | F | C | P | M | W | P | V | N | I | V | A | F | A | Y | A | V | ...V | D | G | A | Q | R | L | G | R | V | A | ... |
| Clawed toad | ...C | F | C | P | M | W | P | V | N | I | V | G | F | A | Y | S | L | ...I | D | G | A | F | R | L | G | R | V | A | ... |
| Zebra fish  | ...C | F | C | P | V | W | P | I | N | I | V | G | F | A | Y | S | I | ...V | D | G | A | R | R | L | G | R | V | A | ... |
